# Supplementary material for: Do illness rating systems predict discharge location, length of stay, and cost after total hip arthroplasty?
Source: PubMed Central journal article supplement — Arthroplast Today. 2018 Mar 21;4(2):210–5. doi: 10.1016/j.artd.2018.01.004 (PMC5994639; doi:10.1016/j.artd.2018.01.004), 2018-03-21
Supplement: mmc3.pdf [file mmc3.pdf]

# INDIVIDUAL CONFLICT OF INTEREST STATEMENT

## *American Association of Hip and Knee Surgeons*

(Adopted from the American Academy of Orthopaedic Surgeons disclosure statement)

The following form **must be filled out completely and submitted by each author (example, 6 authors, 6 forms).**  
**All items require a response. If there is no relevant disclosure for a given item, enter "None."**

### **Using illness rating systems to predict discharge location following total knee arthroplasty**

1. Royalties from a company or supplier (The following conflicts were disclosed)  
Innomed
2. Speakers bureau/paid presentations for a company or supplier (The following conflicts were disclosed)  
Zimmer Biomet, DePuy Synthes
- 3A. Paid employee for a company or supplier (The following conflicts were disclosed)  
None
- 3B. Paid consultant for a company or supplier (The following conflicts were disclosed)  
Zimmer Biomet, DePuy Synthes
- 3C. Unpaid consultants for a company or supplier (The following conflicts were disclosed)  
None
4. Stock or stock options in a company or supplier (The following conflicts were disclosed)  
Procter and Gamble
5. Research support from a company or supplier as a Principal Investigator (The following conflicts were disclosed)  
Zimmer Biomet, DePuy Synthes
6. Other financial or material support from a company or supplier (The following conflicts were disclosed)  
None
7. Royalties, financial or material support from publishers (The following conflicts were disclosed)  
None
8. Medical/Orthopaedic publications editorial/governing board (The following conflicts were disclosed)  
BMC Musculoskeletal Disorders
9. Board member/committee appointments for a society (The following conflicts were disclosed)  
American Academy of Orthopedic Surgeons

### **Each author must sign AND print or type his/her name, date and submit a separate form**

In addition, one BLINDED Conflict of Interest form (no author names used) should be submitted per manuscript with all author disclosures.

Atul F. Kamath



July 9, 2017

Author Name (Print or Type)

Author Signature

Date
