# Supplementary material for: Do illness rating systems predict discharge location, length of stay, and cost after total hip arthroplasty?
Source: PubMed Central journal article supplement — Arthroplast Today. 2018 Mar 21;4(2):210–5. doi: 10.1016/j.artd.2018.01.004 (PMC5994639; doi:10.1016/j.artd.2018.01.004), 2018-03-21
Supplement: mmc4.pdf [file mmc4.pdf]

# INDIVIDUAL CONFLICT OF INTEREST STATEMENT

## *American Association of Hip and Knee Surgeons*

(Adopted from the American Academy of Orthopaedic Surgeons disclosure statement)

The following form **must be filled out completely and submitted by each author (example, 6 authors, 6 forms).**  
**All items require a response. If there is no relevant disclosure for a given item, enter "None."**

### Manuscript Title

1. Royalties from a company or supplier (The following conflicts were disclosed)

φ

2. Speakers bureau/paid presentations for a company or supplier (The following conflicts were disclosed)

φ

3A. Paid employee for a company or supplier (The following conflicts were disclosed)

φ

3B. Paid consultant for a company or supplier (The following conflicts were disclosed)

Zimmer-Biomet (Warsaw, IN), Acuitive Technologies (Allendale, NJ)

3C. Unpaid consultants for a company or supplier (The following conflicts were disclosed)

φ

4. Stock or stock options in a company or supplier (The following conflicts were disclosed)

φ

5. Research support from a company or supplier as a Principal Investigator (The following conflicts were disclosed)

Zimmer-Biomet

6. Other financial or material support from a company or supplier (The following conflicts were disclosed)

φ

7. Royalties, financial or material support from publishers (The following conflicts were disclosed)

φ

8. Medical/Orthopaedic publications editorial/governing board (The following conflicts were disclosed)

Journal of Hip Surgery

9. Board member/committee appointments for a society (The following conflicts were disclosed)

Member-at-large, Knee Society Board of Directors

**Each author must sign AND print or type his/her name, date and submit a separate form**

In addition, one BLINDED Conflict of Interest form (no author names used) should be submitted per manuscript with all author disclosures.

Charles Nelson  
Author Name (Print or Type)

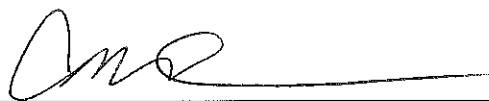  
Author Signature

7/11/17  
Date
